# Supplementary material for: HIV-1 Vpr antagonizes innate immune activation by targeting karyopherin-mediated NF-κB/IRF3 nuclear transport
Source: eLife journal article supplement (doi:10.7554/elife.60821), 2020-12-10
Supplement: supp [file elife-60821-supp-v2.zip]

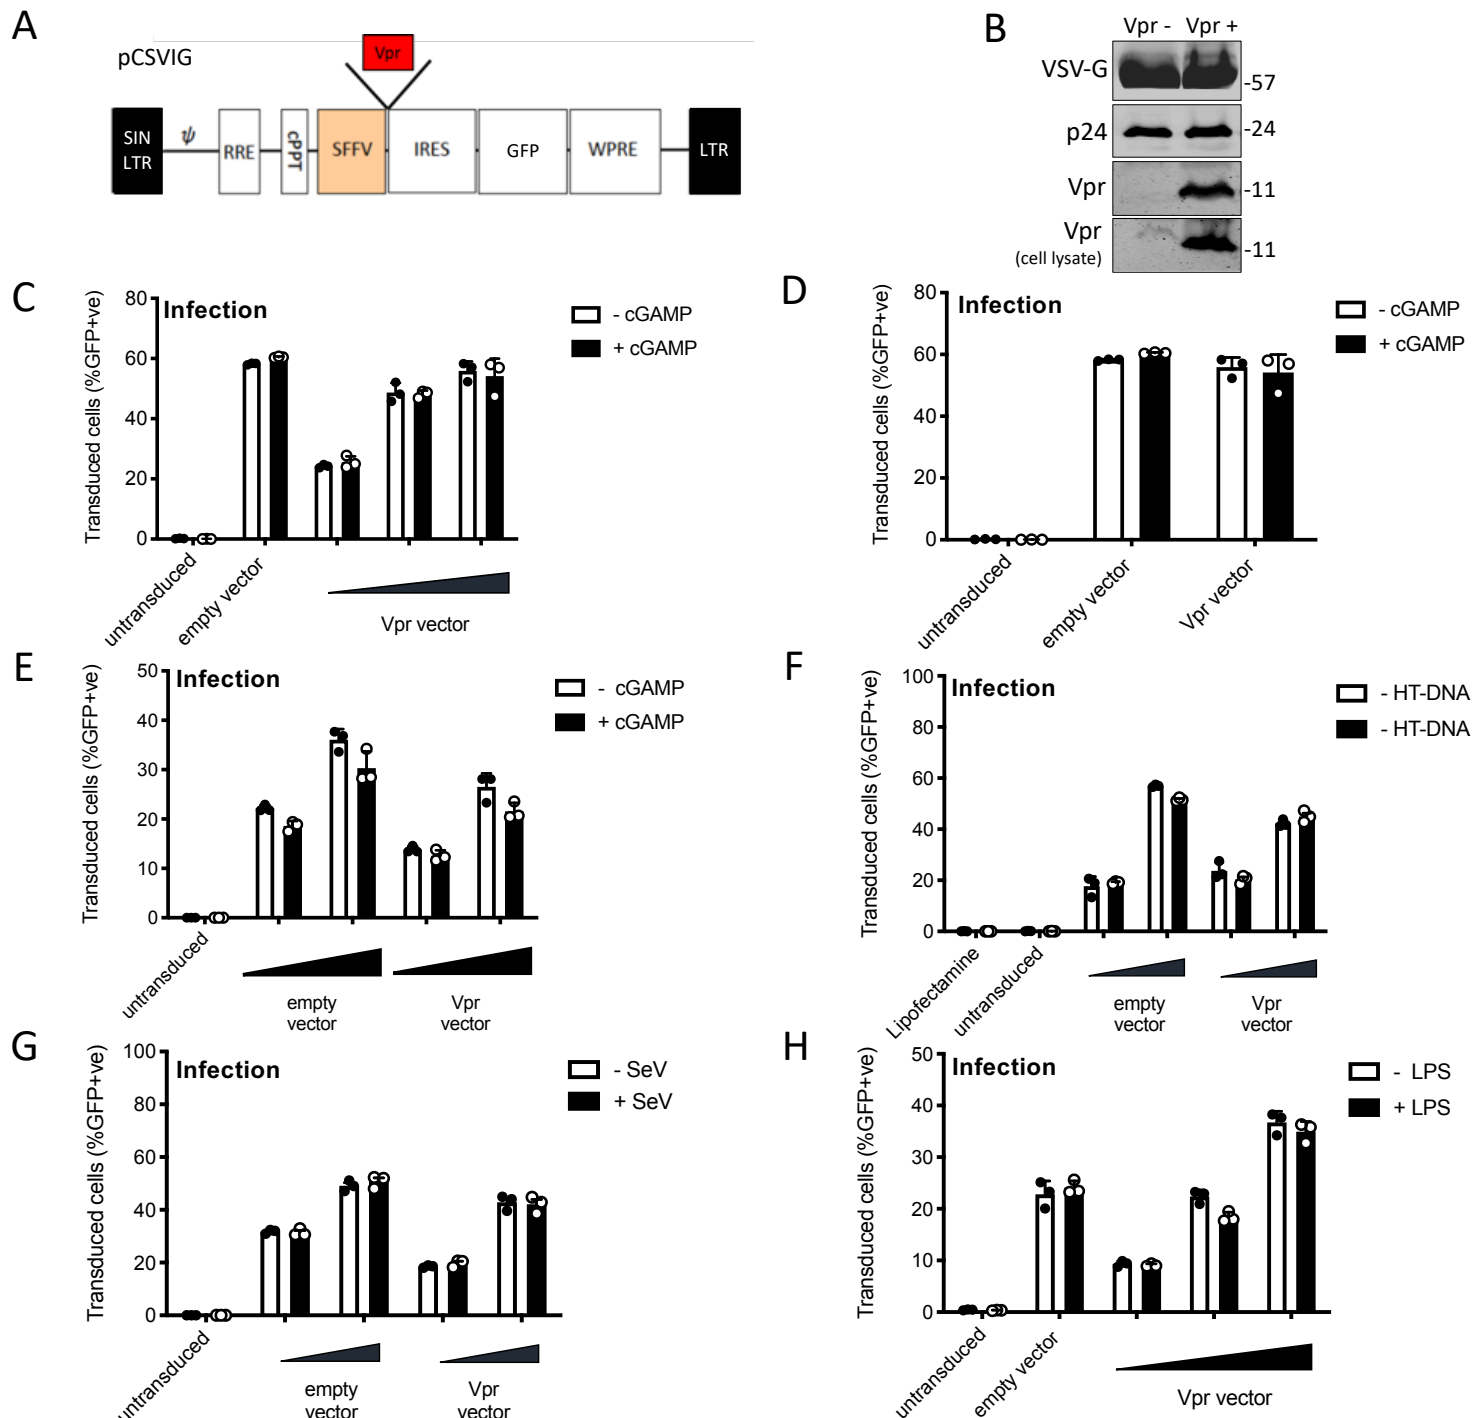

**Figure 2 figure supplement 1 HIV-1 Vpr expression inhibits interferon stimulated gene expression after stimulation with various innate immune stimuli**

(A) Vpr encoding lentiviral expression construct (pCSVIG) contained self-inactivating Long terminal repeat (SIN LTR), Rev response element (RRE), Central polypurine tract (cPPT), Spleen focus-forming virus promoter (SFFV), internal ribosome entry site (IRES), green fluorescent protein (GFP) and Woodchuck hepatitis virus post-transcriptional regulatory element (WPRE). (B) Immunoblot detecting VSV-G envelope, capsid (p24) and Vpr in vector supernatant and Vpr additionally in target cell lysate. Size markers in kDa are indicated on the right. (C) Percentage of THP-1 cells in Figure 2A transduced by the vector encoding Vpr and GFP (MOI 0.25, 0.5, 1) or empty vector encoding GFP alone (MOI 1) and treated with cGAMP (5 µg/ml) or left untreated as a control. (D) Percentage of THP-1 cells in Figure 2B transduced by the vector encoding Vpr and GFP (MOI 1) or empty vector encoding GFP alone (MOI 1) and treated with cGAMP (5 µg/ml) or left untreated as a control. (E) Percentage of THP-1 cells in Figure 2C transduced by the vector encoding Vpr and GFP (MOI 0.5, 1) or empty vector expressing GFP alone (MOI 0.5, 1) and treated with cGAMP (5 µg/ml) or left untreated as a control. (F) Percentage of THP-1 cells in Figure 2D transduced by the vector encoding Vpr and GFP (MOI 0.5, 1) or empty vector encoding GFP alone (MOI 0.5, 1) and stimulated with HT-DNA transfection (5 µg/ml) or left untreated as a control. (G) Percentage of THP-1 cells in Figure 2E transduced by the vector encoding Vpr and GFP (MOI 0.5, 1) or empty vector expressing GFP alone (MOI 0.5, 1) and stimulated with Sendai virus infection or left untreated as a control. (H) Percentage of THP-1 cells in Figure 2F transduced by the vector encoding Vpr and GFP (MOI 0.25, 0.5, 1) or empty vector encoding GFP alone (MOI 1) and stimulated with LPS treatment (1 µg/ml) or left untreated as a control. Data are expressed as means  $\pm$  SD (n = 3). Data are representative of three (C, F-H) or two (B, D, E) independent experiments.
