# Supplementary material for: HIV-1 Vpr antagonizes innate immune activation by targeting karyopherin-mediated NF-κB/IRF3 nuclear transport
Source: eLife journal article supplement (doi:10.7554/elife.60821), 2020-12-10
Supplement: supp [file elife-60821-supp-v2.zip]

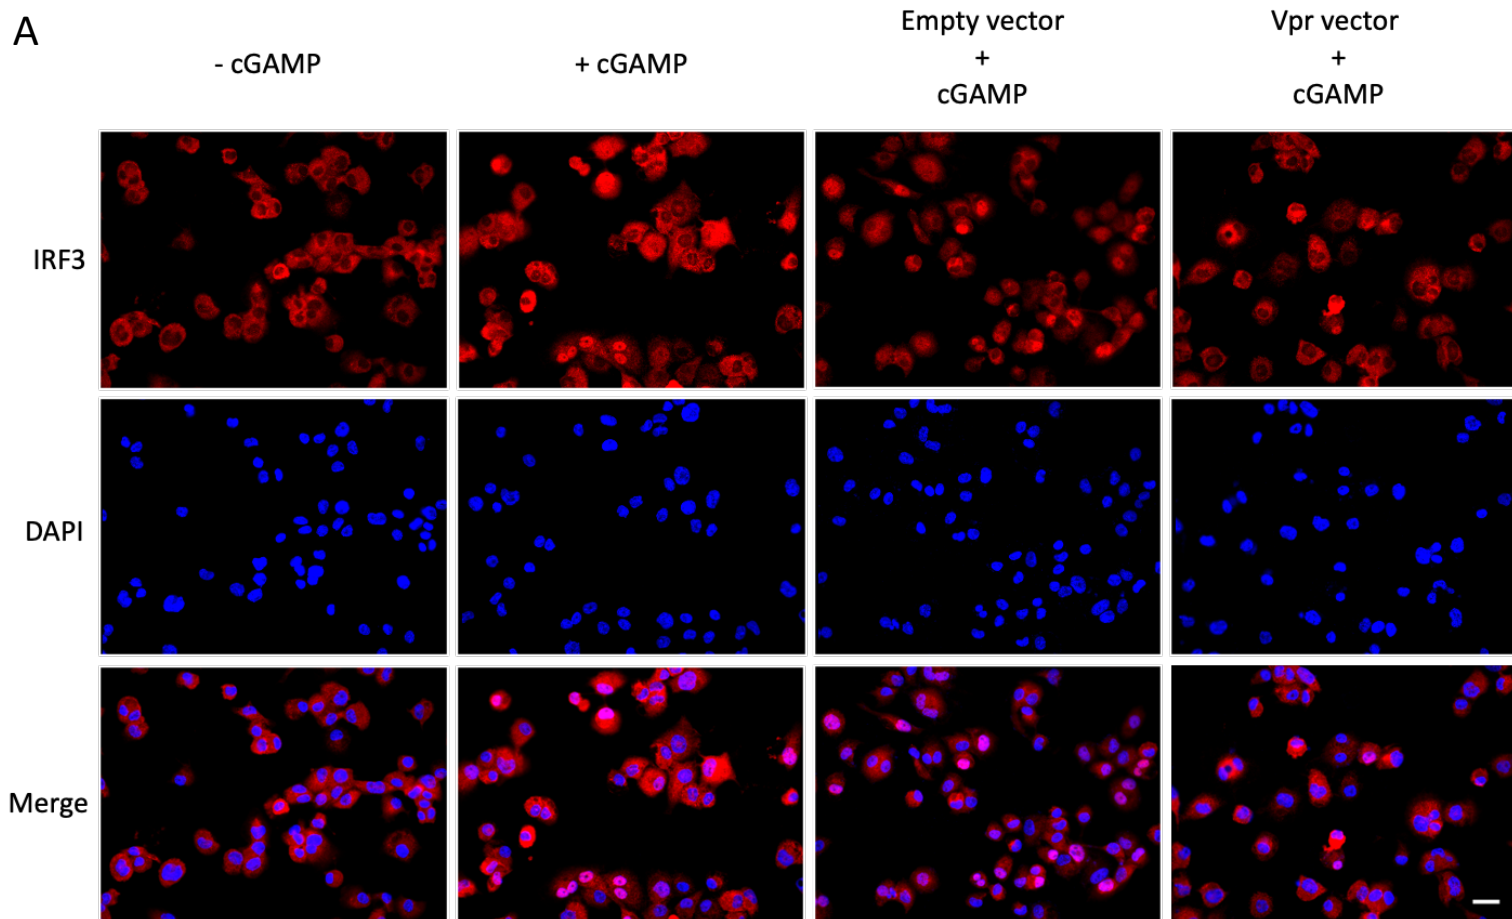

**Figure 5 figure supplement 2 Nuclear translocation of IRF3 after cGAMP stimulation in the presence or absence of Vpr**

(A) Representative immunofluorescence images showing IRF3 (red) nuclear translocation in PMA differentiated THP-1 cells treated with cGAMP, or left untreated, and infected with HIV-1 GFP bearing Vpr, or lacking Vpr, or left uninfected. 4',6-Diamidine-2'-phenylindole dihydrochloride (DAPI) stains nuclear DNA (Blue). Scale bars represent 20  $\mu\text{m}$ .
