# Supplementary material for: HIV-1 Vpr antagonizes innate immune activation by targeting karyopherin-mediated NF-κB/IRF3 nuclear transport
Source: eLife journal article supplement (doi:10.7554/elife.60821), 2020-12-10
Supplement: supp [file elife-60821-supp-v2.zip]

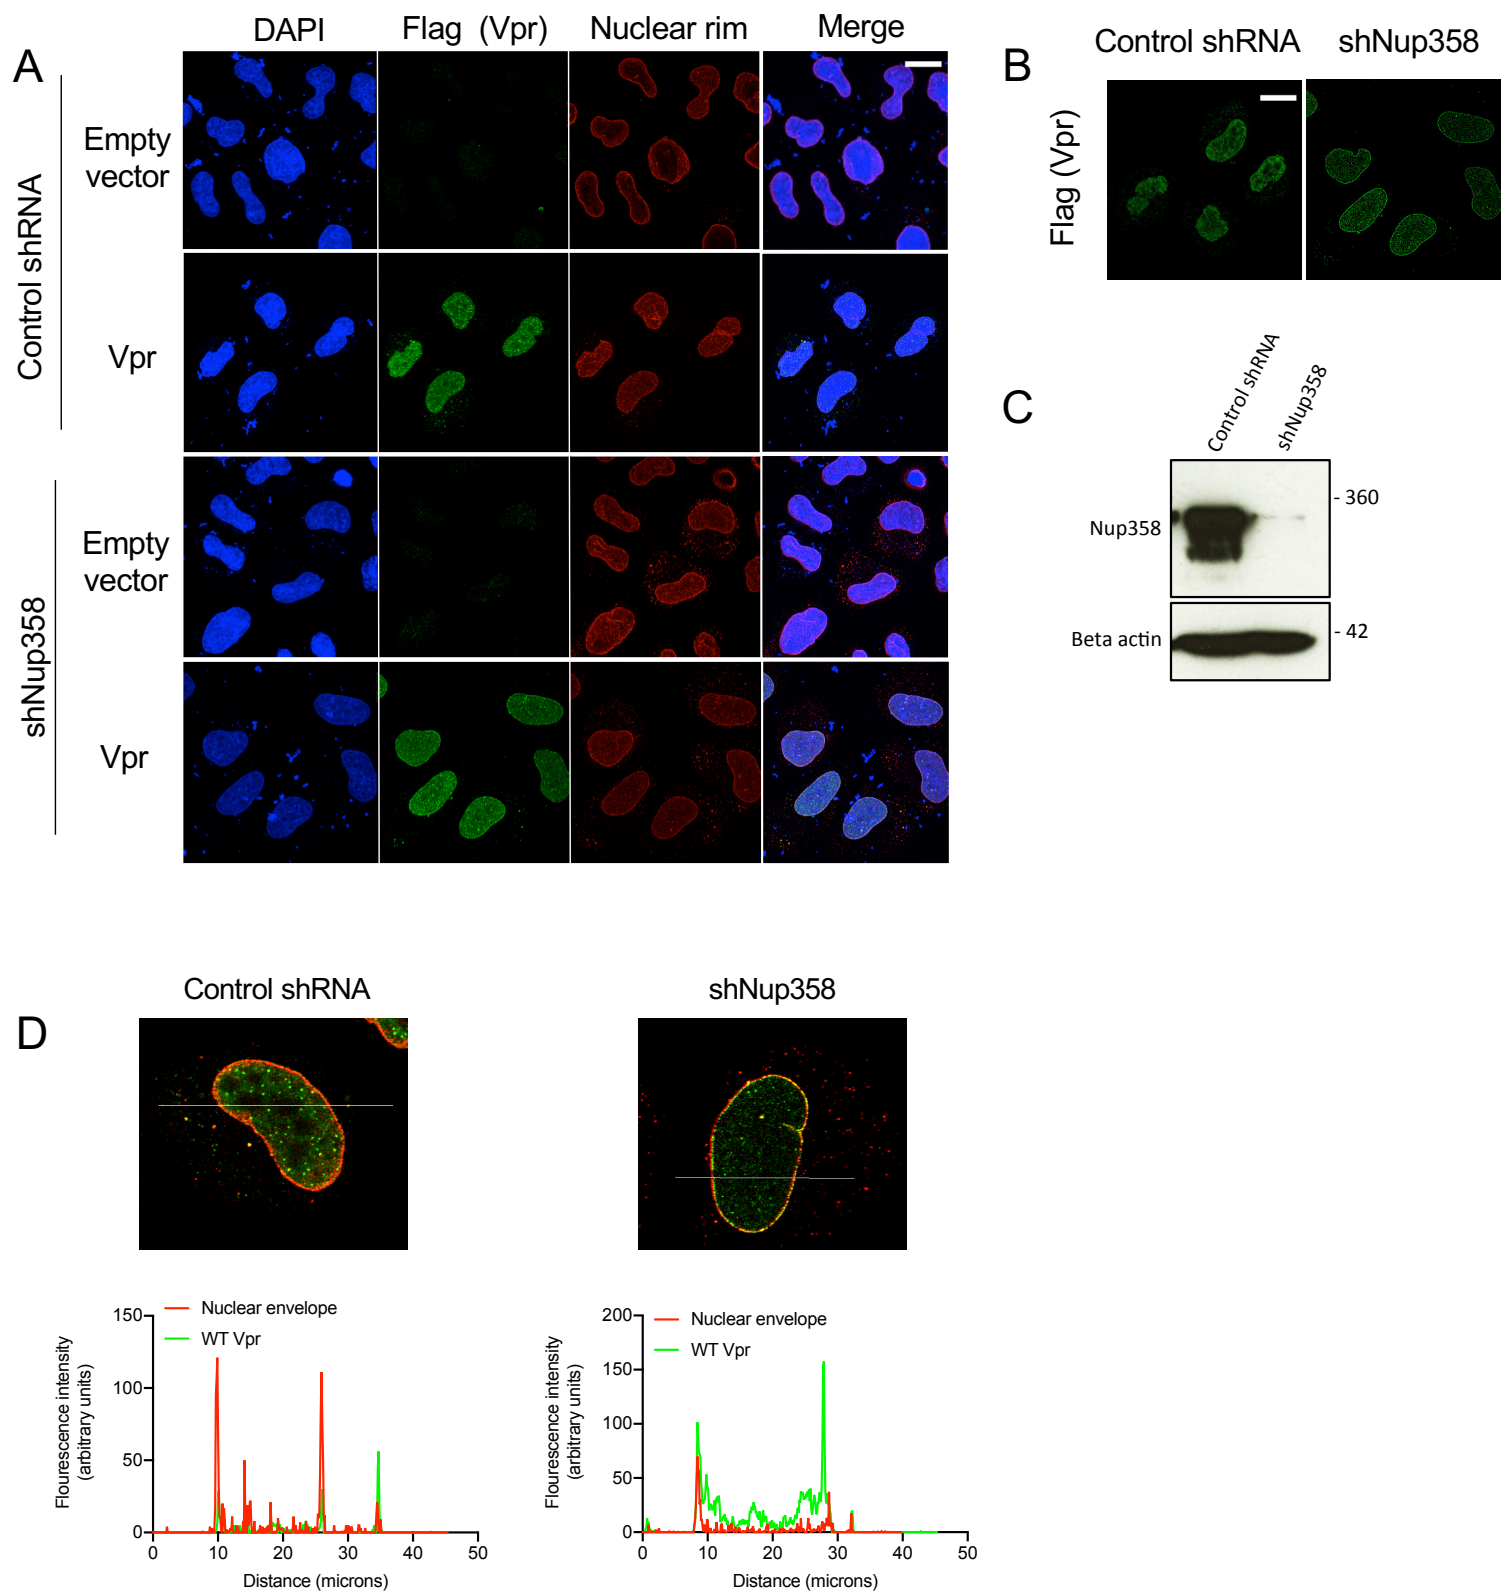

**Figure 4 figure supplement 1 Nup358 is not required for Vpr colocalization with mab414 nuclear pore staining**

(A) Immunofluorescence images of HeLa cells expressing a control, or Nup358 targeting, shRNA transfected with empty vector or Flag-tagged Vpr encoding pcDNA3.1 plasmid (50 ng) using antibodies detecting the Flag-tag (green) or the nuclear pore complex (mab414) (red). 4',6-Diamidino-2'-phenylindole dihydrochloride (DAPI) stains nuclear DNA (Blue). (B) Selected confocal images (z-section) of cells in (A) showing effect of Nup358 depletion on colocalization of Vpr with mab414 nuclear pore staining (C) Immunoblot detecting Nup358, or actin as a loading control, from extracted HeLa cells expressing a control, or Nup358 targeting, shRNA in cells from A. Size markers are shown (kDa). (D) Assessment of colocalization of Flag-tagged Vpr and mab414 stained nuclear pores in cells expressing a control, or Nup358 targeting, shRNA. Scale bars represent 10  $\mu$ m.
