# Supplementary material for: HIV-1 Vpr antagonizes innate immune activation by targeting karyopherin-mediated NF-κB/IRF3 nuclear transport
Source: eLife journal article supplement (doi:10.7554/elife.60821), 2020-12-10
Supplement: supp [file elife-60821-supp-v2.zip]

Archive with 9 entries (9 files):
- elife_poa_e60821_Figure_1_figure_supplement_1.pdf
- elife_poa_e60821_Figure_2_figure_supplement_1.pdf
- elife_poa_e60821_Figure_3_figure_supplement_1.pdf
- elife_poa_e60821_Figure_4_figure_supplement_1.pdf
- elife_poa_e60821_Figure_5_figure_supplement_1.pdf
- elife_poa_e60821_Figure_5_figure_supplement_2.pdf
- elife_poa_e60821_Figure_6_figure_supplement_1.pdf
- elife_poa_e60821_Figure_7_figure_supplement_1.pdf
- elife_poa_e60821_Transparent_Reporting_File.docx
